# Supplementary material for: Evaluation of Candidate Genes from Orphan FEB and GEFS+ Loci by Analysis of Human Brain Gene Expression Atlases
Source: PubMed Central journal article supplement (PMC3157479; doi:10.1371/journal.pone.0023149), 2011-08-17
Supplement: pone.0023149.s001.pdf [file pone.0023149.s001.pdf]

# Evaluation of candidate genes from orphan FEB and GEFS+ loci by analysis of human brain gene expression atlases

Rosario M. Piro, Ivan Molineris, Ugo Ala  
and Ferdinando Di Cunto

## Table S1

List of GEO accessions of the ‘traditional’ microarray expression data set.

|          |          |          |          |          |          |
|----------|----------|----------|----------|----------|----------|
| GSM80565 | GSM80566 | GSM80567 | GSM80568 | GSM80569 | GSM80570 |
| GSM80571 | GSM80572 | GSM80573 | GSM80574 | GSM80575 | GSM80581 |
| GSM80585 | GSM80586 | GSM80587 | GSM80591 | GSM80592 | GSM80593 |
| GSM80594 | GSM80595 | GSM80596 | GSM80597 | GSM80598 | GSM80599 |
| GSM80600 | GSM80601 | GSM80616 | GSM80617 | GSM80618 | GSM80619 |
| GSM80620 | GSM80621 | GSM80622 | GSM80623 | GSM80626 | GSM80627 |
| GSM80628 | GSM80636 | GSM80637 | GSM80638 | GSM80639 | GSM80640 |
| GSM80641 | GSM80642 | GSM80643 | GSM80644 | GSM80645 | GSM80646 |
| GSM80647 | GSM80650 | GSM80651 | GSM80652 | GSM80653 | GSM80660 |
| GSM80661 | GSM80662 | GSM80663 | GSM80664 | GSM80665 | GSM80666 |
| GSM80667 | GSM80668 | GSM80669 | GSM80670 | GSM80671 | GSM80675 |
| GSM80676 | GSM80677 | GSM80678 | GSM80679 | GSM80680 | GSM80681 |
| GSM80682 | GSM80683 | GSM80684 | GSM80690 | GSM80691 | GSM80692 |
| GSM80693 | GSM80699 | GSM80700 | GSM80701 | GSM80702 | GSM80703 |
| GSM80704 | GSM80705 | GSM80706 | GSM80708 | GSM80709 | GSM80711 |
| GSM80713 | GSM80714 | GSM80715 | GSM80721 | GSM80722 | GSM80723 |
| GSM80724 | GSM80744 | GSM80745 | GSM80746 | GSM80747 | GSM80752 |
| GSM80754 | GSM80756 | GSM80760 | GSM80761 | GSM80762 | GSM80763 |
| GSM80766 | GSM80767 | GSM80772 | GSM80773 | GSM80774 | GSM80775 |
| GSM80800 | GSM80801 | GSM80802 | GSM80803 | GSM80804 | GSM80817 |
| GSM80818 | GSM80819 | GSM80827 | GSM80828 | GSM80829 | GSM80830 |
| GSM80831 | GSM80832 | GSM80833 | GSM80834 | GSM80835 | GSM80836 |
| GSM80837 | GSM80838 | GSM80839 | GSM80840 | GSM80841 | GSM80846 |
| GSM80847 | GSM80848 | GSM80849 | GSM80850 | GSM80851 | GSM80852 |
| GSM80854 | GSM80855 | GSM80856 | GSM80857 | GSM80858 | GSM80859 |
| GSM80860 | GSM80861 | GSM80862 | GSM80863 | GSM80870 | GSM80871 |
| GSM80872 | GSM80873 | GSM80879 | GSM80880 | GSM80881 | GSM80892 |
| GSM80893 | GSM80894 | GSM80896 | GSM80907 | GSM80908 | GSM80909 |

(continued on the next page)

Table S1 (continued)

|           |           |           |           |           |           |
|-----------|-----------|-----------|-----------|-----------|-----------|
| GSM80910  | GSM119615 | GSM119616 | GSM119617 | GSM119618 | GSM119619 |
| GSM119620 | GSM119621 | GSM119622 | GSM119623 | GSM119624 | GSM119625 |
| GSM119626 | GSM119627 | GSM119628 | GSM119629 | GSM119630 | GSM119631 |
| GSM119632 | GSM119633 | GSM119634 | GSM119635 | GSM119636 | GSM119637 |
| GSM119638 | GSM119639 | GSM119640 | GSM119641 | GSM119642 | GSM119643 |
| GSM119644 | GSM119645 | GSM119646 | GSM119647 | GSM119648 | GSM119649 |
| GSM119650 | GSM119651 | GSM119652 | GSM119653 | GSM119654 | GSM119655 |
| GSM119656 | GSM119657 | GSM119658 | GSM119659 | GSM119660 | GSM119661 |
| GSM119662 | GSM119663 | GSM119664 | GSM119665 | GSM119666 | GSM119667 |
| GSM119668 | GSM119669 | GSM119670 | GSM119671 | GSM119672 | GSM119673 |
| GSM119674 | GSM119675 | GSM119676 | GSM119677 | GSM119678 | GSM119679 |
| GSM119680 | GSM119681 | GSM119682 | GSM119683 | GSM119684 | GSM119685 |
| GSM119686 | GSM119687 | GSM119688 | GSM175829 | GSM175830 | GSM175831 |
| GSM175832 | GSM175842 | GSM175843 | GSM175844 | GSM175845 | GSM175846 |
| GSM175847 | GSM175848 | GSM175849 | GSM175850 | GSM175851 | GSM175852 |
| GSM175853 | GSM175854 | GSM175855 | GSM175856 | GSM175857 | GSM175858 |
| GSM175859 | GSM175860 | GSM175861 | GSM175862 | GSM175863 | GSM175864 |
| GSM175869 | GSM175870 | GSM175871 | GSM175872 | GSM175873 | GSM175874 |
| GSM175875 | GSM175876 | GSM175877 | GSM175885 | GSM175886 | GSM175887 |
| GSM175888 | GSM175893 | GSM175894 | GSM175895 | GSM175901 | GSM175902 |
| GSM175903 | GSM175904 | GSM175907 | GSM175956 | GSM175957 | GSM175958 |
| GSM175959 | GSM175987 | GSM175988 | GSM175989 | GSM175990 | GSM176017 |
| GSM176018 | GSM176020 | GSM176024 | GSM176030 | GSM176031 | GSM176033 |
| GSM176034 | GSM176036 | GSM176037 | GSM176045 | GSM176046 | GSM176047 |
| GSM176048 | GSM176049 | GSM176050 | GSM176051 | GSM176052 | GSM176053 |
| GSM176054 | GSM176056 | GSM176058 | GSM176059 | GSM176060 | GSM176061 |
| GSM176064 | GSM176065 | GSM176066 | GSM176067 | GSM176068 | GSM176069 |
| GSM176070 | GSM176071 | GSM176073 | GSM176077 | GSM176116 | GSM176120 |
| GSM176124 | GSM176125 | GSM176147 | GSM176148 | GSM176149 | GSM176150 |
| GSM176151 | GSM176152 | GSM176153 | GSM176154 | GSM176155 | GSM176156 |
| GSM176157 | GSM176158 | GSM176159 | GSM176160 | GSM176161 | GSM176162 |
| GSM176163 | GSM176164 | GSM176165 | GSM176166 | GSM176167 | GSM176168 |
| GSM176169 | GSM176170 | GSM176171 | GSM176172 | GSM176173 | GSM176174 |
| GSM176175 | GSM176176 | GSM176177 | GSM176178 | GSM176179 | GSM176180 |
| GSM176181 | GSM176182 | GSM176183 | GSM176184 | GSM176185 | GSM176206 |
| GSM176207 | GSM176210 | GSM176211 | GSM176212 | GSM176213 | GSM176214 |
| GSM176215 | GSM176216 | GSM176217 | GSM176222 | GSM176223 | GSM176224 |
| GSM176225 | GSM176226 | GSM176233 | GSM176293 | GSM176295 | GSM176296 |
| GSM176297 | GSM176344 | GSM176345 | GSM176346 | GSM176347 | GSM176352 |
| GSM176353 | GSM176354 | GSM176355 | GSM176357 | GSM176363 | GSM176364 |
| GSM176365 | GSM176366 | GSM176367 | GSM176369 | GSM176370 | GSM176371 |
| GSM176372 | GSM176373 | GSM176374 | GSM176379 | GSM176380 | GSM176381 |
| GSM176382 | GSM176383 | GSM176384 | GSM176393 | GSM176394 | GSM176395 |
| GSM176397 | GSM176398 | GSM176401 | GSM176402 | GSM176403 | GSM176404 |
| GSM176411 | GSM176412 | GSM176413 | GSM176436 | GSM176445 | GSM176446 |
| GSM176447 | GSM176448 | GSM176451 | GSM176452 | GSM176453 | GSM176454 |
| GSM184354 | GSM184355 | GSM184356 | GSM184357 | GSM184358 | GSM184359 |
| GSM184360 | GSM184361 | GSM184362 |           |           |           |
