# Supplementary material for: Evaluation of Candidate Genes from Orphan FEB and GEFS+ Loci by Analysis of Human Brain Gene Expression Atlases
Source: PubMed Central journal article supplement (PMC3157479; doi:10.1371/journal.pone.0023149), 2011-08-17
Supplement: pone.0023149.s002.pdf [file pone.0023149.s002.pdf]

Evaluation of candidate genes from orphan FEB  
and GEFS+ loci by analysis of human brain gene  
expression atlases

Rosario M. Piro, Ivan Molineris, Ugo Ala  
and Ferdinando Di Cunto

**Table S2**

Results of the leave-one-out tests for human CNS-related OMIM phenotypes  
(see the next page).

| Expression data                | Ref. | $N$ | Candidates<br>(average) | $g-p$ pairs | Ranked first |      |             | Ranked 1st–10th |      |             | Ranked $\leq 10\%$ |      |             |
|--------------------------------|------|-----|-------------------------|-------------|--------------|------|-------------|-----------------|------|-------------|--------------------|------|-------------|
|                                |      |     |                         |             | Obs.         | Exp. | $P$ -value  | Obs.            | Exp. | $P$ -value  | Obs.               | Exp. | $P$ -value  |
| Mouse Brain Atlas <sup>†</sup> | sim. | 50  | 73.8                    | 797         | 16           | 11   | 7.95e-02    | 149             | 108  | 2.64e-05*** | 126                | 80   | 1.80e-07*** |
| Mouse Brain Atlas <sup>†</sup> | sim. | 100 | 137.7                   | 844         | 13           | 6    | 9.84e-03**  | 105             | 61   | 6.26e-08*** | 132                | 84   | 1.93e-07*** |
| Mouse Brain Atlas <sup>†</sup> | sim. | 200 | 256.6                   | 847         | 6            | 3    | 1.16e-01    | 61              | 33   | 4.84e-06*** | 139                | 85   | 5.08e-09*** |
| Human Brain Atlas              | sim. | 50  | 65.9                    | 675         | 17           | 10   | 3.05e-02*   | 141             | 102  | 3.91e-05*** | 97                 | 68   | 1.81e-04*** |
| Human Brain Atlas              | sim. | 100 | 121.4                   | 745         | 14           | 6    | 4.06e-03**  | 105             | 61   | 5.43e-08*** | 111                | 75   | 1.53e-05*** |
| Human Brain Atlas              | sim. | 200 | 224.2                   | 748         | 8            | 3    | 2.04e-02*   | 54              | 33   | 4.44e-04*** | 117                | 75   | 9.32e-07*** |
| Human Brain Atlas              | sim. | 400 | 387.4                   | 748         | 6            | 2    | 1.39e-02*   | 35              | 19   | 6.93e-04*** | 116                | 75   | 1.61e-06*** |
| Human Brain Atlas              | dis. | 50  | 67.1                    | 188         | 12           | 3    | 2.45e-05*** | 53              | 28   | 1.78e-06*** | 41                 | 19   | 1.15e-06*** |
| Human Brain Atlas              | dis. | 100 | 124.7                   | 209         | 10           | 2    | 7.82e-06*** | 46              | 17   | 2.46e-10*** | 49                 | 21   | 1.09e-08*** |
| Human Brain Atlas              | dis. | 200 | 227.4                   | 211         | 7            | 1    | 4.51e-05*** | 29              | 9    | 6.01e-08*** | 51                 | 21   | 1.98e-09*** |
| Human Brain Atlas              | dis. | 400 | 387.0                   | 211         | 3            | 1    | 1.77e-02*   | 19              | 5    | 2.97e-06*** | 50                 | 21   | 6.01e-09*** |
| GEO dataset                    | sim. | 50  | 89.4                    | 912         | 29           | 10   | 7.65e-07*** | 190             | 102  | 2.08e-17*** | 163                | 91   | 2.26e-13*** |
| GEO dataset                    | sim. | 100 | 170.5                   | 926         | 24           | 5    | 2.71e-09*** | 115             | 54   | 5.03e-14*** | 170                | 93   | 7.54e-15*** |
| GEO dataset                    | sim. | 200 | 316.7                   | 929         | 18           | 3    | 2.01e-09*** | 82              | 29   | 2.25e-16*** | 176                | 93   | 1.37e-16*** |
| GEO dataset                    | sim. | 400 | 549.4                   | 929         | 11           | 2    | 1.59e-06*** | 51              | 17   | 9.25e-12*** | 170                | 93   | 1.78e-14*** |

$N$  represents the size of the artificial loci having a maximum of  $2N+1$  genes. The average numbers of effective candidates with expression profiles and the numbers of evaluated  $g-p$  pairs are shown. The observed and expected numbers of  $g-p$  pairs, for which the true phenotype-causing gene  $g$  ranks first, among the top ten and within the best 10% of the prioritized list, is reported along with the corresponding  $P$ -values (one-tailed Fisher exact test). Significant  $P$ -values are highlighted (\* $P<0.05$ ; \*\* $P<0.01$ ; \*\*\* $P<0.001$ ). Reference genes (Ref.) were either taken from similar phenotypes (sim.), or from the OMIM disease phenotype itself (dis.). <sup>†</sup>Results taken from Piro et al., *Bioinformatics* 26:i618–i624, 2010; artificial loci with  $N=400$  have not been evaluated in our previous study.
