# Supplementary material for: Evaluation of Candidate Genes from Orphan FEB and GEFS+ Loci by Analysis of Human Brain Gene Expression Atlases
Source: PubMed Central journal article supplement (PMC3157479; doi:10.1371/journal.pone.0023149), 2011-08-17
Supplement: pone.0023149.s003.pdf [file pone.0023149.s003.pdf]

# Evaluation of candidate genes from orphan FEB and GEFS+ loci by analysis of human brain gene expression atlases

Rosario M. Piro, Ivan Molineris, Ugo Ala  
and Ferdinando Di Cunto

## Table S3

Overlap of correct leave-one-out predictions (over all CNS-related OMIM phenotypes) for reference genes from similar phenotypes.

| $N$ | Ranked first |     |         | Ranked 1st–10th |     |            | Ranked $\leq 10\%$ |     |            |
|-----|--------------|-----|---------|-----------------|-----|------------|--------------------|-----|------------|
|     | HBA          | GEO | overlap | HBA             | GEO | overlap    | HBA                | GEO | overlap    |
| 50  | 17           | 29  | 0 (0%)  | 141             | 190 | 37 (27.6%) | 97                 | 163 | 23 (23.7%) |
| 100 | 14           | 24  | 0 (0%)  | 105             | 115 | 14 (16.3%) | 111                | 170 | 27 (24.3%) |
| 200 | 8            | 18  | 0 (0%)  | 54              | 82  | 4 (7.4%)   | 117                | 176 | 30 (25.9%) |
| 400 | 6            | 11  | 0 (0%)  | 35              | 51  | 2 (5.9%)   | 116                | 170 | 28 (24.8%) |

$N$  represents the size of the artificial loci, having a maximum of  $2N+1$  genes. The number of predictions with the true phenotype-causing gene  $g$  ranking first, among the top ten and within the best 10% of the prioritized list (see also Table S2), is reported for the Human Brain Atlas (HBA) and the GEO microarray dataset (GEO) along with their overlap. Parentheses indicate the corresponding fraction of the maximum possible overlap.
